# Supplementary material for: Magnetic properties tuned by oxamido bridging ligand derivatives in two new hybrid organic inorganic nitronyl nitroxide copper(ii) complexes
Source: Royal Society of Chemistry journal article supplement (doi:10.1039/b704127f), 2007-01-01
Supplement: b704127f.pdf [file b704127f.pdf]

Electronic Supplementary Material for CrystEngComm  
 This Journal is © The Royal Society of Chemistry 2007

**S1 Selected bond Lengths (Å) and angles (°) of complex 1**

|                              |            |                                            |           |
|------------------------------|------------|--------------------------------------------|-----------|
| Cu(1)–N(4)                   | 1.916(2)   | Cu(1)–O(3) <sup>#</sup>                    | 2.005(2)  |
| Cu(1)–N(1)                   | 1.973(2)   | Cu(1)–N(5)                                 | 2.036(3)  |
| Cu(1)–O(5)                   | 2.515(3)   | Cu(1)–O(7) <sup>*</sup>                    | 2.665(7)  |
| N(4)–Cu(1)–N(1)              | 175.64(10) | N(4)–Cu(1)–N(5)                            | 82.26(10) |
| N(4)–Cu(1)–O(3) <sup>#</sup> | 83.80(8)   | N(1)–Cu(1)–N(5)                            | 97.99(10) |
| N(1)–Cu(1)–O(3) <sup>#</sup> | 95.91(8)   | O(3) <sup>#</sup> –Cu(1)–N(5)              | 166.05(8) |
| O(5)–Cu(1)–O(7) <sup>*</sup> | 174.0(2)   | O(5)–Cu(1)–N(1)                            | 85.13(14) |
| O(5)–Cu(1)–N(4)              | 99.21(14)  | N(1)–Cu(1)–O(7) <sup>*</sup>               | 94.29(16) |
| N(4)–Cu(1)–O(7) <sup>*</sup> | 81.36(16)  | O(3) <sup>#</sup> –Cu(1)–O(7) <sup>*</sup> | 83.6(2)   |
| N(5)–Cu(1)–O(7) <sup>*</sup> | 94.1(2)    | O(3) <sup>#</sup> –Cu(1)–O(5)              | 90.45(11) |
| N(5)–Cu(1)–O(5)              | 91.93(12)  |                                            |           |

Symmetry codes: <sup>#</sup>: -x, -y + 1, -z + 1, <sup>\*</sup>: -x, y + 1/2, -z + 1/2

**S2 Selected bond Lengths (Å) and angles (°) of complex 2**

|                                |            |                                |            |
|--------------------------------|------------|--------------------------------|------------|
| Cu(1)–N(4)                     | 1.9687(14) | Cu(2)–N(10)                    | 1.9612(14) |
| Cu(1)–O(3) <sup>#1</sup>       | 1.9696(13) | Cu(2)–O(6) <sup>#2</sup>       | 1.9703(13) |
| Cu(1)–N(5)                     | 1.9898(15) | Cu(2)–N(9)                     | 1.9950(15) |
| Cu(1)–N(1)                     | 2.0256(15) | Cu(2)–N(6)                     | 2.0110(15) |
| Cu(1)–O(5)                     | 2.5532(15) | Cu(2)–O(2)                     | 2.6644(16) |
|                                |            | Cu(2)–O(7)                     | 2.711(2)   |
| N(4)–Cu(1)–O(3) <sup>#1</sup>  | 83.79(6)   | N(10)–Cu(2)–O(6) <sup>#2</sup> | 84.09(5)   |
| N(4)–Cu(1)–N(5)                | 93.66(6)   | N(10)–Cu(2)–N(9)               | 94.42(6)   |
| O(3) <sup>#1</sup> –Cu(1)–N(5) | 173.16(6)  | O(6) <sup>#2</sup> –Cu(2)–N(9) | 174.66(6)  |
| N(4)–Cu(1)–N(1)                | 170.69(6)  | N(10)–Cu(2)–N(6)               | 173.41(5)  |
| O(3) <sup>#1</sup> –Cu(1)–N(1) | 88.51(6)   | O(6) <sup>#2</sup> –Cu(2)–N(6) | 89.36(6)   |
| N(5)–Cu(1)–N(1)                | 93.40(6)   | N(9)–Cu(2)–N(6)                | 92.17(6)   |
| N(4)–Cu(1)–O(5)                | 96.68(5)   | N(10)–Cu(2)–O(2)               | 102.66(6)  |
| O(3) <sup>#1</sup> –Cu(1)–O(5) | 100.48(5)  | O(6) <sup>#2</sup> –Cu(2)–O(2) | 95.00(5)   |
| N(5)–Cu(1)–O(5)                | 86.10(6)   | N(9)–Cu(2)–O(2)                | 80.31(6)   |
| N(1)–Cu(1)–O(5)                | 89.86(5)   | N(6)–Cu(2)–O(2)                | 78.54(6)   |
| O(6) <sup>#2</sup> –Cu(2)–O(7) | 102.00(6)  | N(10)–Cu(2)–O(7)               | 90.38(6)   |
| N(9)–Cu(2)–O(7)                | 83.11(7)   | N(6)–Cu(2)–O(7)                | 90.32(6)   |
| O(2)–Cu(2)–O(7)                | 159.59(5)  |                                |            |

Symmetry codes: <sup>#1</sup>: -x + 3, -y, -z + 1, <sup>#2</sup>: -x + 2, -y + 2, -z
